# Supplementary material for: Preclinical Testing of an Oncolytic Parvovirus: Standard Protoparvovirus H-1PV Efficiently Induces Osteosarcoma Cell Lysis In Vitro
Source: Viruses. 2017 Oct 17;9(10):301. doi: 10.3390/v9100301 (PMC5691652; doi:10.3390/v9100301)
Supplement: Supplementary file 1 [file viruses-09-00301-s001.pdf]

# Supplementary Materials: Preclinical Testing of an Oncolytic Parvovirus: Standard Protoparvovirus H-1PV Efficiently Induces Osteosarcoma Cell Lysis In Vitro

Carsten Geiss, Zoltán Kis, Barbara Leuchs, Monika Frank-Stöhr, Jörg R. Schlehofer, Jean Rommelaere, Christiane Dinsart and Jeannine Lacroix

**Table S1.** Human osteosarcoma cell lines used in this study.

| Cell Culture | Age | Gender | Year | Morphology    | Reference |
|--------------|-----|--------|------|---------------|-----------|
| CAL72        | 10  | male   | 1989 | fibroblastoid | [1]       |
| H-OS         | 13  | female | 1971 | mixed*        | [2]       |
| MG-63        | 14  | male   | 1977 | fibroblastoid | [3]       |
| SaOS-2       | 11  | female | 1973 | epithelial    | [4]       |
| U2-OS        | 15  | female | 1964 | epithelial    | [5]       |

\* mixed, fibroblast and epithelial like morphology

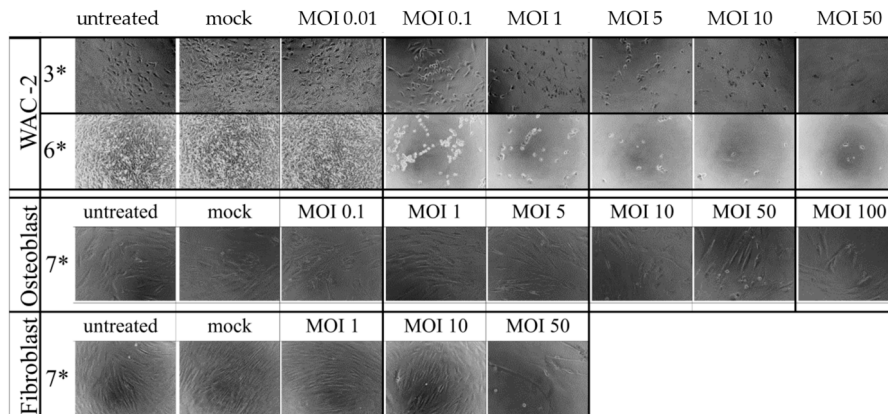

**Figure S1.** No visible cytopathic effects of wild type H-1PV in non-transformed mesenchymal cells. Phase contrast microscopy images for evaluating the effect of H-1PV dose on cell morphology. Images were recorded prior cell viability and cytotoxicity testing at day 7 in case of primary fibroblast and osteoblast cells and in WAC-2 cells at days 3 and 6 after H-1PV infection (400× magnification).

CAL-72 mock

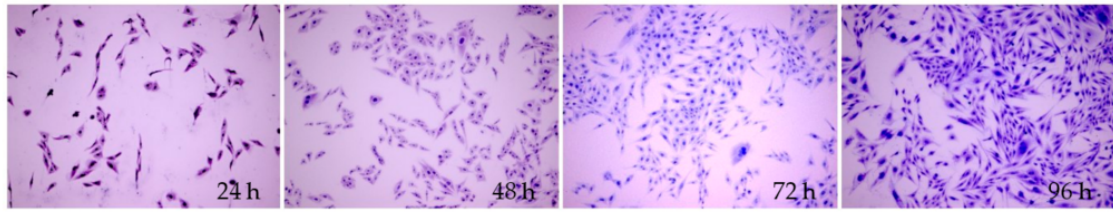

CAL-72 H-1PV

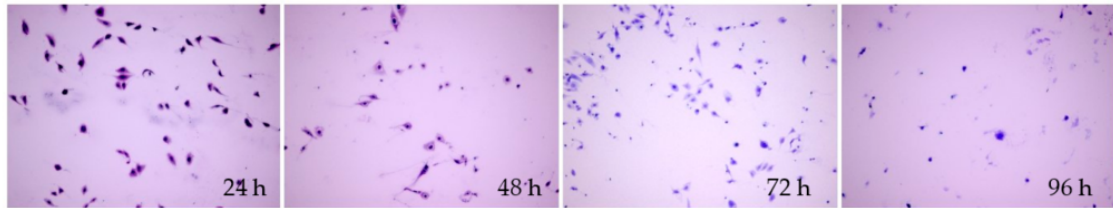

H-OS mock

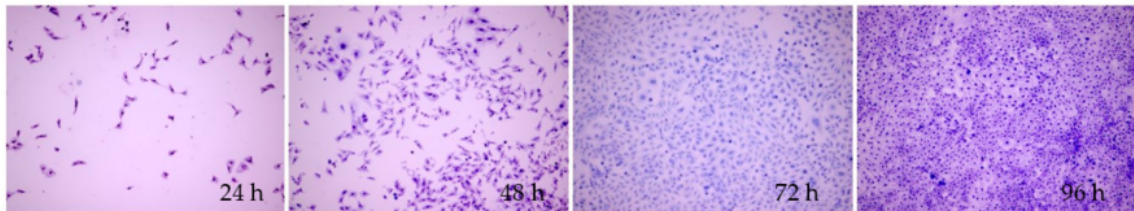

H-OS H-1PV

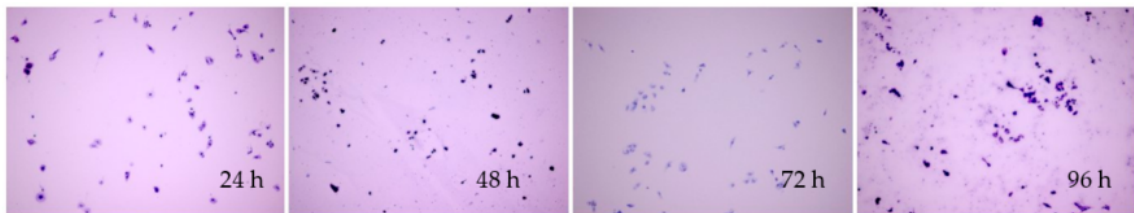

MG-63 mock

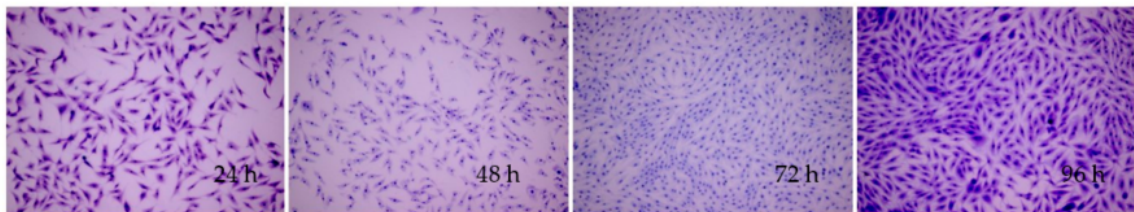

MG-63 H-1PV

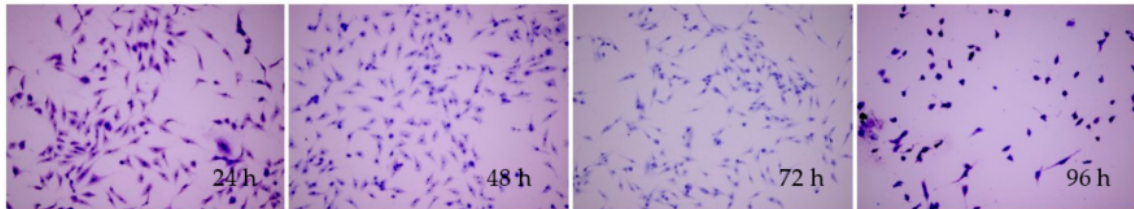

**Figure S2.** H-1PV infection induces antiproliferative and cytotoxic effects in osteosarcoma cell lines (continued from Figure 5).

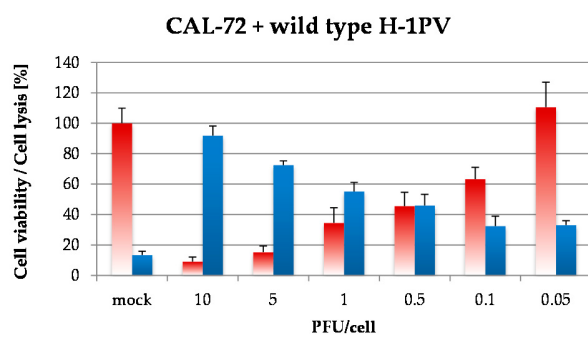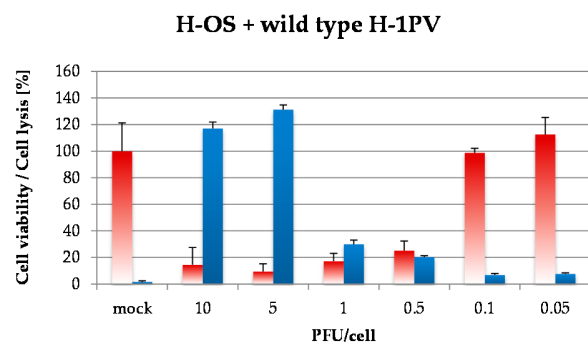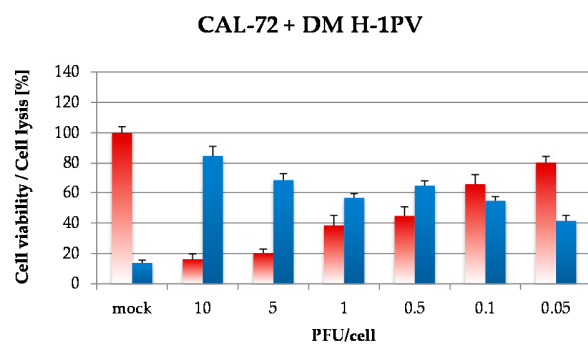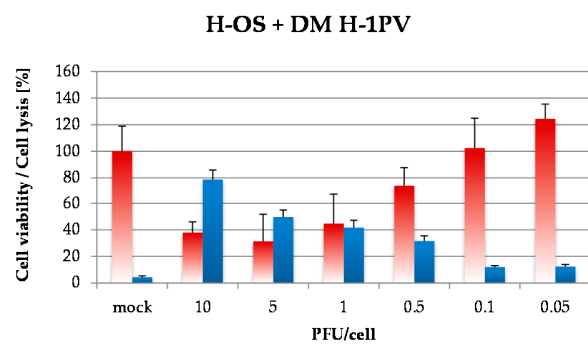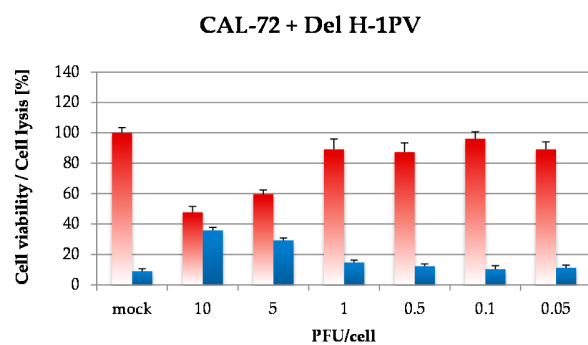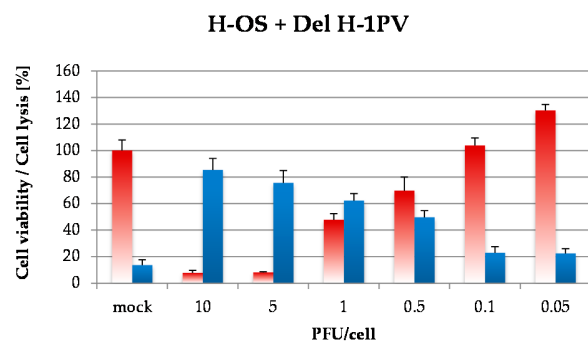

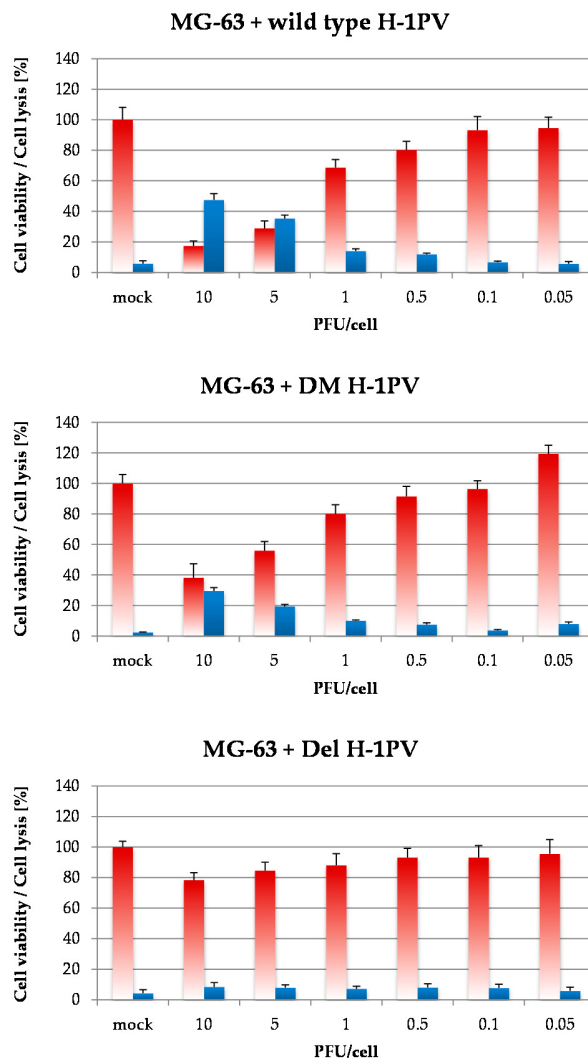

**Figure S3.** Comparative cytotoxicity testing on mutant H-1PV strains Del H-1PV and DM H-1PV, and standard wild type H-1PV (continued from Figure 7).

## References

1. Rochet, N.; Dubousset, J.; Mazeau, C.; Zanghellini, E.; Farges, M.F.; de Novion, H.S.; Chompret, A.; Delpech, B.; Cattani, N.; Frenay, M.; et al. Establishment, characterisation and partial cytokine expression profile of a new human osteosarcoma cell line (CAL 72). *Int. J. Cancer* **1999**, *82*, 2, 282–285.
2. McAllister, R.M.; Gardner, M.B.; Greene, A.E.; Bradt, C.; Nichols, W.W.; Landing, B.H. Cultivation in vitro of cells derived from a human osteosarcoma. *Cancer* **1971**, *27*, 2, 397–402.
3. Billiau, A.; Edy, V.G.; Heremans, H.; Van Damme, J.; Desmyter, J.; Georgiades, J.A.; De Somer, P. Human interferon: Mass production in a newly established cell line, MG-63. *Antimicrob. Agents Chemother.* **1977**, *12*, 11–15.

4. Fogh, J.; Wright, W.C.; Loveless, J.D. Absence of HeLa cell contamination in 169 cell lines derived from human tumors. *J. Natl. Cancer Inst.* **1977**, *58*, 209–214.
5. Ponten, J.; Saksela, E. Two established in vitro cell lines from human mesenchymal tumours. *Int. J. Cancer* **1967**, *2*, 434–447.

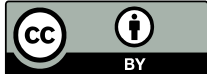

© 2017 by the authors. Licensee MDPI, Basel, Switzerland. This article is an open access article distributed under the terms and conditions of the Creative Commons Attribution (CC BY) license (<http://creativecommons.org/licenses/by/4.0/>).
